# Supplementary material
Source: ML conference proceedings conference paper supplement (https://openreview.net/forum?id=sOOrTkYgb6)
Supplement: supplementary_material [file attachment]

## Sheet: Sheet1
	Ski	husky	Tennis	Banana	Horse	street	Airplane	Dishwasher	Miniskirt	Chihuahua	Ice	Gorilla	Basketball	Catamaran	CD	Paper	park	Projectile	Violin	Scuba
1	DSEG	Quick	Water	Slic	Fel	Water	DSEG	Slic	Quick	Water	DSEG	DSEG	Quick	DSEG	Slic	Water	DSEG	Quick	DSEG	Water
2	Fel	DSEG	Fel	Water	Quick	DSEG	Fel	Water	DSEG	Slic	Fel	Water	Slic	Fel	Quick	Slic	Fel	Slic	Fel	Slic
3	Quick	Water	Quick	Fel	DSEG	Slic	Quick	DSEG	Fel	Quick	Water	Slic	Fel	Quick	Fel	DSEG	Quick	Water	Quick	Quick
4	Slic	Fel	DSEG	Quick	Water	Quick	Slic	Fel	Slic	Fel	Slic	Fel	Water	Water	DSEG	Fel	Slic	Fel	Slic	Fel
5	Water	Slic	Slic	DSEG	Slic	Fel	Water	Quick	Water	DSEG	Quick	Quick	DSEG	Slic	Water	Quick	Water	DSEG	Water	DSEG
